1 **Rectus Femoris Electromyography Signal Clustering: Data-Driven Management of Crouch**  
2 **Gait in Patients with Cerebral Palsy**

3 **Mehrdad Davoudi<sup>1</sup>, Firooz Salami<sup>1</sup>, Robert Reisig<sup>1</sup>, Dimitrios A. Patikas<sup>2</sup>, Sebastian I. Wolf<sup>1\*</sup>**

4 <sup>1</sup> Clinic for Orthopaedics, Heidelberg University Hospital, Heidelberg, Germany.

5 <sup>2</sup> Laboratory of Neuromechanics, School of Physical Education and Sports Science at Serres,  
6 Aristotle University of Thessaloniki, Greece.

7 **\* Correspondence:**

8 Sebastian I. Wolf

9 Sebastian.Wolf@med.uni-heidelberg.de

10 Clinic for Orthopedics, Schlierbacher Landstr. 200a, 69118 Heidelberg, Germany.

11

12

13

14

15

16

17

18

19

20

## 21 **Abstract**

22 This study aimed to investigate how electromyography (EMG) cluster analysis of the rectus femoris  
23 (RF) could help to better interpret gait analysis in patients with cerebral palsy (CP). The retrospective  
24 gait data of CP patients were categorized into two groups: initial examination (E1, 881 patients) and  
25 subsequent examination (E2, 377 patients). Envelope-formatted EMG data of RF were collected. Using  
26 PCA and a combined PSO-K-means algorithm, main clusters were identified. Patients were further  
27 classified into crouch, jump, recurvatum, stiff and mild gait for detailed analysis. The clusters (labels)  
28 were characterized by a significant peak EMG activity during mid-swing (L1), prolonged EMG activity  
29 during stance (L2), and a peak EMG activity during loading response (L3). Notably, L2 contained 76%  
30 and 92% of all crouch patients at E1 and E2, respectively. Comparing patients with a crouch gait pattern  
31 in L2-E1 and L2-E2, two subgroups emerged: patients with persistent crouch (G1) and patients  
32 showing improvement at E2 (G2). The minimum activity of RF during 20-45% of the gait was  
33 significantly higher ( $p= 0.025$ ) in G1 than in G2. A greater chance of improvement from crouch gait  
34 might be associated with lower RF activity during the stance phase. Using our findings, we could  
35 potentially establish an approach to improve clinical decision-making regarding treatment of patients  
36 with CP.

37 **Keywords: EMG, Rectus femoris, cerebral palsy, cluster analysis, k-means.**

## 38 **1 Introduction**

39 Cerebral palsy (CP) is a nonprogressive movement and posture disorder that develops in a fetus during  
40 pregnancy or infancy [1]. It is caused by an injury to the developing brain, which mostly happens  
41 before birth. Spastic CP is the most common form of the disease, which arises from damage to the  
42 motor cortex [1]. In this condition, muscles appear stiff and tight. Abnormal muscle tone and motor  
43 deficit affect the walking ability of patients with CP [2].

44 Surface electromyography (EMG) can be used to measure muscle activity in a noninvasive and  
45 clinically meaningful manner. In patients with CP, 3D gait analysis with simultaneous EMG  
46 measurements is often conducted to gain insight into muscle function as part of prescribing treatment  
47 and evaluating treatment effect [3]. Combining EMG data of the rectus femoris (RF) muscle with  
48 kinematics, kinetics, and clinical data, Reinbold et al. demonstrated a method to predict the outcome  
49 of RF transfer surgery [4]. They concluded that a diminished range of knee flexion and a high activity  
50 of RF during swing phase, in addition to a positive RF spasticity (Ely) test, are the main factors for  
51 deciding to perform RF transfer surgery [4]. Patikas et al. [5] also suggested that EMG could be used  
52 to better interpret gait in children with hemiplegic spastic CP. They reported a prolonged activation of  
53 RF during the swing phase as a part of the underlying gait compensatory mechanisms in these patients.  
54 Additionally, they stated that EMG signals can describe the clinical condition of patients before and  
55 after surgery [6]. Particularly, several studies also reported a strong association between the EMG of  
56 RF and gait impairments in these patients [7-9].

57 Although the literature confirms the importance of EMG for treatment decision-making in patients  
58 with CP, there are still some limitations here, such as cross-talk, artifacts, and poor signal quality [10],  
59 for using these data in clinical settings. In addition, interpreting the results derived from these signals  
60 requires the expertise of a clinician and, currently, this is primarily conducted visually and qualitatively  
61 [11]. Consequently, there is a need for an approach that can assist clinicians by providing an objective  
62 analysis and interpretation of the EMG signals.

63 Some studies quantitatively classified CP patients into different groups based on kinematics. Sutherland  
64 and Davids [12] classified common gait abnormalities of the knee in CP into four types: crouch, jump,  
65 recurvatum, and stiff knee. Rodda et al. [13] proposed an algorithm using a combination of 3D gait  
66 analysis, videos, and clinical examinations to classify the gait of patients with hemiplegia and diplegia.  
67 While these studies [14] have shown that kinematics-based grouping is helpful for treatment

68 management and clinical decision-making in CP, a comprehensive EMG-based grouping system for  
69 these patients remains a challenge. The lack of access to an extensive EMG database definitively poses  
70 a significant problem for developing such systems.

71 Clustering analysis represents an analytical technique to group-unlabeled data for extracting  
72 meaningful information [15]. In recent studies, researchers used a K-means clustering algorithm as an  
73 unsupervised approach to classify the pathological gait patterns observed in patients with CP [16, 17].  
74 Sangeux et al. [18] conducted a study using a large dataset of CP patients to compare sagittal gait  
75 patterns and K-means clustering. They introduced the "Plantar flexor–Knee extension (PFKE) couple  
76 index", which measures the distance of ankle and knee kinematics during 20 to 45% of the gait cycle  
77 relative to normative data. Their findings revealed a significant association between the traditional CP  
78 gait groups and the five clusters identified through the PFKE-based K-means algorithm. Additionally,  
79 they observed a correlation between the clusters and spasticity in the gastrocnemius-soleus muscles.

80 K-means is a powerful clustering algorithm that is widely used for various clustering problems.  
81 However, this method is associated with two significant limitations : 1) converging to a local minimum  
82 and 2) sensitivity to selecting the initial cluster centroids, which converges on the local rather than the  
83 global optima [19]. Therefore, the initial selection of cluster centroids plays a critical role in processing  
84 the K-means algorithm. This challenge can also be considered as the optimization of an "objective  
85 function" that effectively groups the points in the data space into clusters. To address this problem,  
86 researchers have proposed several methods that employ global optimization search algorithms to  
87 determine the initial points for the K-means algorithm [20]. Particle swarm optimization (PSO) is a  
88 good, nature-inspired and population-based, effective global optimization algorithm [21].

89 To the best of our knowledge, no clustering research has been conducted regarding EMG in patients  
90 with CP while walking. In the current study, we focused on EMG of the RF because of the importance  
91 of this muscle in the gait of these patients. Developing a hybrid PSO- K-means clustering algorithm,

92 we aimed to analyze the EMG data of patients with CP and to evaluate the relationship between  
93 common CP gait abnormalities, changes in gait over time, and the identified clusters. Therefore, we  
94 hypothesize that the RF EMG patterns of patients with CP are not uniform and that they can be  
95 classified into clusters that might be linked to the clinical picture. Furthermore, examining these EMG  
96 patterns before and after treatment might help us identify EMG features that could aid in patient  
97 prognosis.

## 98 **2 Materials and Methods**

### 99 **2-1 Participants**

100 The data analyzed in this study were part of a larger database established at the local University Clinics  
101 in the years 2000-2022 and derived from more than 2000 hemiplegia/diplegia patients with CP and  
102 about 350 typically developed individuals. This study was approved by the ethics committee of the  
103 Medical Faculty of Heidelberg University, Germany, with the serial number S-243/2022. The day of  
104 access to the data in the local clinical data base was May 9<sup>th</sup> 2022. Only author (SIW) had access to  
105 the identity of patients at the day of data collection. After data collection the data set was anonymized.  
106 In agreement the local ethics committee we refrained from obtaining patients'/subjects' consent since  
107 a) the data to be evaluated are already available at the investigating institution and the original data  
108 collection was carried out as part of routine medical care and the data are pseudonymized and further  
109 processed for research purposes only; and b) for the purpose of research, only persons who have  
110 previously been authorized to inspect patients' data for routine medical care and have access to  
111 personal data may access the data again, and c) there is no disclosure of personal data to external  
112 bodies.

113

114 The retrospective gait data used for this study were primarily divided into two groups. The group of  
 115 patients who visited the gait lab for the first time (E1, first examination) and those who visited a second  
 116 time, too (E2, second examination). Therefore, it should be noted that the E2 patients in our study  
 117 represent the same individuals examined at two different time points. The inclusion criteria were  
 118 availability of EMG, kinematics and kinetics data for each subject, walking only barefoot without any  
 119 assistive device, and classified as GMFCS level I, II, or III [14]. For hemiplegia patients, only the  
 120 affected side was considered. After applying these criteria, 881 and 377 patients were recruited as E1  
 121 and E2, respectively, and 117 persons as typically developed (TD) (reference group). In addition, the  
 122 patients with CP were classified as crouch, jump, recurvatum, stiff knee, and mild gait [12, 22]. The  
 123 characteristics of the participants are shown in Table 1.

124

125

Table 1. Demographic and descriptive data of the participants at their first (E1) and second (E2) examinations and also healthy individuals.

|                                                          | <i>E1 (n=881)</i>      | <i>E2 (n=377)</i>        | <i>TD (n=117)</i>      |
|----------------------------------------------------------|------------------------|--------------------------|------------------------|
| <i>Age (years)</i>                                       | 16.8 ± 9.6 (58.3-3.3)  | 16.9 ± 8.5 (54.2-3.7)    | 21.7 ± 12.3 (46 -6)    |
| <i>Height (cm)</i>                                       | 151.9 ± 37.1 (197-94)  | 152.6 ± 18.2 (196-98)    | 161.9 ± 19.8 (195-108) |
| <i>Body mass (kg)</i>                                    | 46 ± 19.5 (125.1-13.6) | 46.8 ± 17.3 (101.8-14.5) | 66.4 ± 16.8 (91-19)    |
| <i>Sex (male/female)</i>                                 | 510/371                | 212/165                  | 58/59                  |
| <i>CP type (diplegia/ hemiplegia)</i>                    | 700/181                | 332/45                   |                        |
| <i>Subgroups (crouch/ jump/ recurvatum/ stiff/ mild)</i> | 72/65/109/42/593       | 38/28/24/19/268          |                        |
| <i>GMFCS level (I/ II/ III)</i>                          | 140/130/15             | 59/67/3                  |                        |
| <i>Interval between examinations (years)</i>             | 2.4 ± 1.9 (13.5-0.1)   |                          |                        |

126

127 **2-2 Data acquisition**

128 All subjects walked barefoot at a self-selected speed along a lane 15 m in length during data acquisition.  
129 Kinematics and kinetics were recorded using a twelve-camera 3D motion analysis system (VICON,  
130 Oxford Metrics Limited, UK) operating at 120 Hz and using three force plates (Kistler Instruments  
131 Co.), respectively. The skin-mounted markers were applied according to the protocol of Kadaba et al.  
132 [23] and the plug-in-gait model was chosen for analysis. Subsequently, gait parameters of at least seven  
133 strides were determined.

134 The EMG data were recorded from eight lower extremity major muscles including the RF, right and  
135 left legs, using myon 320 (Myon AG, Schwarzenberg, CH). Bipolar surface adhesive electrodes (Blue  
136 Sensor, Ambu Inc., Glen Burnie, MD, USA) were placed on the targeted muscles, following the  
137 guidelines provided by SENIAM [24]. The distance between the electrodes was set at 2 cm [6]. To  
138 amplify the EMG signal, the Biovision EMG apparatus (Biovision Inc., Wehrheim, Germany) before  
139 2013/2014 and via Delsys (Delsys Inc., Natick, MA, USA) after 2013/14, was utilized with a  
140 preamplification factor of  $\times 5000$ .

141 Clinical examination was exclusively performed by two physiotherapists controlling each other. Knee  
142 extensor muscle strength was assessed according to the Medical Research Council (MRC) [25]. The  
143 spasticity of the RF was tested both by the Duncan-Ely test [26] and by the Tardieu test [27]. According  
144 to the MRC, muscle strength ranged from 5 (the strongest) to 1 (the weakest) The scale for spasticity  
145 ranged from 0 (no spasticity) to 4 (severe spasticity). More information about these (strength and  
146 spasticity) grading systems is available in our previous work [28].

### 147 **2-3 Signal processing**

148 The raw EMG data were then band-pass filtered (Butterworth filter with a cutoff frequency of 20-350  
149 Hz), rectified, and the signal smoothed (Butterworth low-pass filter with a cutoff frequency of 9 Hz),  
150 amplitude-normalized to the mean of signal, time-normalized within one gait cycle (101 datapoint),  
151 and eventually averaged across valid strides in MatLab (The MathWorks, Inc. USA) [6]. Six main

152 features (mean, range, max, min, and their timing) during ten gait phases [6], including whole-gait-  
153 cycle stance, swing, loading response, mid-stance, terminal stance, preswing, initial swing, mid-swing,  
154 and terminal swing phase, were extracted for clustering.

155 To determine a magnitude that describes the deviation of a patient's EMG feature from the reference  
156 group, the norm-distance (NDi) was calculated according to [6] by Equation (1). ND was defined as  
157 the absolute difference between the  $i$ \_th feature of the EMG of the patient  $p$  ( $F_{pi}$ ) and the mean value  
158 of the same feature in the reference group ( $\bar{F}_{ni}$ ), divided by the corresponding standard deviation within  
159 the reference group ( $SD_{ni}$ ). This standardization process served as the initial input for subsequent steps  
160 and can potentially help as a data transformation method to identify meaningful clusters.

$$\text{Eq. 1.} \quad NDi = \frac{|F_{pi} - \bar{F}_{ni}|}{SD_{ni}}$$

## 161 **2-4 Cluster analysis**

162 We applied cluster analysis as an unsupervised stand-alone tool to gain insight into the data  
163 distribution, examine the distinct characteristics of each cluster, and prioritize specific clusters for  
164 subsequent analysis. Therefore, we applied two feature matrices with dimension of  $881 \times 60$  (number  
165 of feature (6)  $\times$  number of gait phases (10)) and  $377 \times 60$  for E1 and E2 conditions, respectively. Prior  
166 to performing clustering analysis, we employed principal component analysis (PCA) to reduce the  
167 dimensionality of the input matrices [29]. The first principal components (PCs), which explained more  
168 than 96% of the total variance, were used for the clustering. The hybrid clustering algorithm was  
169 developed using MatLab software based on the details described in Supplementary material (Appendix  
170 1). In the initial stage, the PSO algorithm was employed for a global search to explore the possible  
171 optimal solutions to predefine the number of clusters. The output of PSO served as the initial centroids  
172 for the K-means algorithm, which was then utilized to refine and generate the final result. Using the  
173 elbow method [30], the number of 'K' was determined. In this method, the changes in the sum of



174 squared differences between the observations and their cluster (SSE) were analyzed by adding the  
175 number of clusters. The point at which there is a sharp change in the elbow curve indicates the K. In  
176 this study, we applied the elbow method on the E1 dataset to determine the K; then we set this for the  
177 E2 clustering as well.

## 178 **2-5 Comparison between the clusters**

179 The Pearson correlation ( $r$ ) was applied to compare the averaged RF EMG of patients in the different  
180 clusters with that of the typically developed group. A more comprehensive investigation of the clusters  
181 (labels)' characteristics conducted through 1) extracting the average hip, knee, and ankle joint angles  
182 and moments of each cluster at E1 and E2 in the sagittal plane and 2) examining the population of the  
183 gait subgroups (crouch, jump, recurvatum, stiff knee, and mild) in each cluster. Descriptive statistics  
184 (mean and standard deviation) were used to compare the clinical examination data between the  
185 conditions.

## 186 **2-6 Comparison between the groups**

187 Considering the changes in the EMG cluster and gait kinematics of the patients from their second  
188 examination (E2), we set two cohorts of patients in E1 in an identified cluster (section 3) who were  
189 determined as crouch and who did not show any changes (G1) or showed improvement (G2) in their  
190 gait later according to E2. All of these patients underwent single-event multilevel surgery (SEMLS)  
191 between the examinations. Gait profile score (GPS) [31] was computed for the groups in both E1 and  
192 E2 to assess gait improvement.

193 To investigate the gait factors resulting in these different responses to the treatment, the EMG data of  
194 the RF muscle from G1 and G2 patients at E1 were compared by extracting six main features (section  
195 2-3) during 20 to 45% of their gait cycle, as described by Sangeux et al. [18]. Applying the  
196 nonparametric Kruskal-Wallis test, we compared the features between G1 and G2 at E1 (p-Value =  
197 0.05). Furthermore, we used statistical parametric mapping (SPM, [www.spm1d.org](http://www.spm1d.org)) implemented in

198 MatLab [32] to compare joint patterns. Fig 1 illustrates the procedure we used in this study in a flow  
199 chart.

200 **Please insert Fig 1**

201 **Fig 1. Flowchart of the methodology used in this study. EMG, electromyography; PSO, particle**  
202 **swarm optimization**

### 203 **3 Results**

204 Fig 2 shows an elbow plot with  $K=3$ , representing the number of clusters (L1, L2, and L3). The first  
205 25 PCs accounted for approximately 96.1% of the variance in the primary dataset and were utilized for  
206 the clustering analysis. Comparing the EMG of RF between the three identified clusters in two  
207 examinations (Fig 3A), they were characterized by a peak during mid-swing (L1), prolonged activity  
208 during (mid- and terminal) stance (L2), and a significant peak during loading response (L3). Notably,  
209 L2 contained 76% (55 out of 72) and 92% (35 out of 38) of all crouch patients at E1 and E2, respectively  
210 (Table 2). An excessive knee flexion during the stance phase of gait (Fig 3B), along with lack of an  
211 extension moment (Fig 3C), for patients detected as cluster 2, supported the sensitivity of our clustering  
212 to the crouch gait.

213 **Please insert Fig 2**

214 **Fig 2. Determination of the number of clusters using the elbow method. The scatter plots show**  
215 **the distribution of input data (E1) in different clusters in which the axes are PC1 and PC2.**

216 **Each color represents a cluster.**

217 Correlation analysis (Table 2) revealed a similarity of more than 0.9 between the average EMG pattern  
218 of patients placed in L3 and the normal population, while L1 patients had the lowest coefficient by 39  
219 and 53% at E1 and E2, respectively.

220 In addition, averaged clinical assessment of the patients (as presented in Table 2 descriptively) revealed  
 221 that the L2 group had lower strength and higher levels of spasticity in their knee extensors than did the  
 222 other two groups. Moreover, the number of patients with more severe motor impairment (GMFCS level  
 223 III) was also higher in the L2 than in the L1 and L3 groups. Comparing G1 (16 patients, 32 limbs) and  
 224 G2 (8 patients, 15 limbs), there was a significant improvement in the GPS of G2 at E2 (Table 3).

225

226

227

228

229

Table 2- Number of patients with a gait abnormality, clinical examination data (mean  $\pm$  SD), and number of patients with different GMFCS level in each cluster examination.

| <i>Conditions<br/>(Clusters-<br/>Examinations)</i> | Gait subgroups count per condition |            |      |      |        | r-<br>correlation<br>to normal<br>EMG | Clinical Examination Parameters |                                 |                                    | GMFCS<br>level<br>(I/ II/<br>III) |
|----------------------------------------------------|------------------------------------|------------|------|------|--------|---------------------------------------|---------------------------------|---------------------------------|------------------------------------|-----------------------------------|
|                                                    | Stiff                              | Recurvatum | Mild | Jump | Crouch |                                       | Knee<br>extensors<br>strength   | Rectus<br>spasticity<br>Tardieu | Rectus<br>spasticity<br>Duncan-Ely |                                   |
| <i>E1-L1</i>                                       | 11                                 | 63         | 224  | 25   | 7      | 0.39                                  | 4.5 $\pm$ 0.6                   | 0.66 $\pm$ 1                    | 0.64 $\pm$ 0.5                     | 57/40/2                           |
| <i>E1-L2</i>                                       | 21                                 | 26         | 178  | 23   | 55     | 0.67                                  | 4.3 $\pm$ 0.6                   | 1.1 $\pm$ 1                     | 0.71 $\pm$ 0.4                     | 19/45/11                          |
| <i>E1-L3</i>                                       | 10                                 | 21         | 190  | 17   | 10     | 0.91                                  | 4.6 $\pm$ 0.5                   | 0.44 $\pm$<br>0.8               | 0.49 $\pm$ 0.5                     | 64/45/2                           |
| <i>E2-L1</i>                                       | 6                                  | 6          | 107  | 10   | 3      | 0.53                                  | 4.3 $\pm$ 0.6                   | 0.68 $\pm$ 1                    | 0.72 $\pm$ 0.5                     | 30/20/0                           |
| <i>E2-L2</i>                                       | 5                                  | 9          | 79   | 12   | 35     | 0.7                                   | 4.2 $\pm$ 0.6                   | 0.96 $\pm$ 1                    | 0.69 $\pm$ 0.5                     | 10/29/2                           |
| <i>E2-L3</i>                                       | 8                                  | 8          | 83   | 6    | 0      | 0.92                                  | 4.4 $\pm$ 0.6                   | 0.44 $\pm$<br>0.9               | 0.59 $\pm$ 0.5                     | 19/18/1                           |

230

Please insert Fig 3

231 **Fig 3. Average rectus femoris electromyography (EMG) (A), knee kinematic (B) and knee**  
 232 **kinetic (C) patterns for different clusters and examinations. Red: L1, Blue: L2, Green: L3,**  
 233 **Black: reference group, Solid lines: E1, Dashed lines: E2.**

Table 3- Mean  $\pm$  SD and statistical comparison for gait profile score (GPS) and rectus femoris electromyography (EMG) features at 20-45% gait between patients with crouch gait (cluster 2) measured before and after surgery (E1 and E2) and demonstrated no significant improvement (G1) or significant improvement during the second examination (G2).

|                                                    | GPS                                                |                  |                                                   |                 |
|----------------------------------------------------|----------------------------------------------------|------------------|---------------------------------------------------|-----------------|
|                                                    | G1                                                 | G2               | Normal                                            |                 |
| <i>E1</i>                                          | 16.25 $\pm$ 2.6                                    | 18.4 $\pm$ 5.9   | 4.87 $\pm$ 1.09                                   |                 |
| <i>E2</i>                                          | 15.16 $\pm$ 3.9                                    | 14.3 $\pm$ 6.3   |                                                   |                 |
| <i>p-value between E1 and E2 within each Group</i> | 0.167                                              | <b>0.033*</b>    |                                                   |                 |
|                                                    | Rectus EMG features in 20-45% gait cycle during E1 |                  |                                                   |                 |
|                                                    | G1                                                 | G2               | <i>p-value between G1 and G2 for each feature</i> | Normal          |
| <i>Min 20-45%</i>                                  | 85.1 $\pm$ 20.2                                    | 69.2 $\pm$ 25.7  | <b>0.025*</b>                                     | 38.3 $\pm$ 14.5 |
| <i>Mean 20-45%</i>                                 | 110.8 $\pm$ 16.3                                   | 100.8 $\pm$ 23.4 | 0.144                                             | 56.7 $\pm$ 21   |
| <i>Max 20-45%</i>                                  | 137.8 $\pm$ 19.1                                   | 128.1 $\pm$ 27.4 | 0.121                                             | 92.2 $\pm$ 36.8 |

\*p-value<0.05

234

Please insert Fig 4

235 **Fig 4. Average rectus femoris electromyography (EMG) (A), knee kinematic (B) and knee**  
236 **kinetic (C) patterns for cluster 2 patients that did not improve (G1) or improved (G2) after**  
237 **surgery (E2) compared to their condition before surgery (E1). Red: G1, Blue: G2, Solid line:**  
238 **E1, Dashed line: E2.**

239 The SPM results did not show any systematic difference ( $p < 0.05$ ) between knee kinematics of G1 and  
240 G2 individuals at E1 (Fig 4A and Fig 4B). Visually, however, the stance peak extension moment for  
241 both groups is at the same level (Fig 4C). As increased RF activity during stance was the main  
242 characteristic of cluster 2, a subjective comparison between the two groups in this phase (Fig 4A)  
243 showed a higher average EMG in G1-E1 than G2-E1. Statistically, as shown in Table 2, there is a  
244 systematic difference between the minimum activity of RF during 20-45% gait between the two groups  
245 ( $p = 0.025$ ). Mean and maximum (features) were also lower for G2. We only reported the main three  
246 features with the lowest p-value.

#### 247 **4 Discussion**

248 Using an unsupervised hybrid PSO- K-means cluster analysis, three main groups were identified from  
249 EMG data of the RF in patients with CP. These clusters differed from each other in level of activity in  
250 swing (L1), stance (L2), and loading response (L3) (Fig 3A). Applying a pre-clustering standardization  
251 technique in combination with PCA, our clustering system could categorize the patients in relation to  
252 the deviation of their EMG results from those of a healthy population. Subsequently, a correlation of  
253 more than 90% was observed between one of the clusters (L3) and a normal EMG (Table 2).  
254 Descriptively, L3 patients showed a stronger knee extensor and a lower RF spasticity. On the other  
255 hand, patterns in patients identified as L1 correlated least with normal patterns (Table 2). It has been  
256 reported that in the majority of children with CP the RF is active during the mid-swing phase, when  
257 this muscle is normally inactive [33]. A high swing peak observed in the mean EMG of this cluster  
258 (L1) aligns with this typical feature of CP.

259 Furthermore, identifying a significant number of patients with a crouch gait as L2 (Table 2) is  
260 consistent with the prolonged activation of RF during stance phase, which is supported by the current  
261 literature [12]. In healthy individuals, quadriceps muscles are typically active for a small portion of the  
262 stance phase. However, in patients with crouch gait, the positioning of the ground reaction force behind  
263 the center of the knee joint requires the quadriceps to be engaged throughout the entire stance phase in  
264 order to maintain stability of the knee joint [34]. Table 1 demonstrates higher levels of RF and weaker  
265 knee extensor strength among individuals classified as L2 at E1 compared to L1 and L3. This cluster  
266 also exhibited a greater proportion of patients with a higher GMFCS level, which may support the  
267 notion that this EMG pattern might be linked to severity of the disability.

268 Investigating the relationship between EMG activity and altered kinematics in G1 patients with  
269 persistent crouch condition and G2 patients with significant GPS improvement, we observed (Table 3)  
270 that a lower minimum activity of RF during 20-45% of the gait cycle was a significant ( $p=0.025$ )  
271 indicator of a better GPS at E2. However, the changes from E1 to E2 for sagittal knee kinematics of  
272 G1 and G2 were not significant. These findings suggest that EMG patterns are important for treatment  
273 decision-making, but that the effectiveness of kinematics, as a widely used clinical measure, is limited.  
274 The G1-G2 EMG comparison was made for the period 20-45% of the gait cycle. Sangeux et al. [18]  
275 developed an index to categorize CP subgroups by considering only this 25% of the gait cycle, mainly  
276 to avoid the loading response effects on the stance phase features. As the relationship between muscle  
277 EMGs and joint kinetics is nonlinear [35], it is difficult to find a direct explanation for the differences  
278 in the kinetics patterns of G1-G2 at E1 based on the RF activity.

279 Several algorithms are available in the literature to determine the optimal number of clusters [36];  
280 however, in this study, the elbow curve at  $K=3$  was obvious and an exact biomechanical meaning for  
281 the clusters supports the algorithm results. For instance, each cluster showed a prominent activation in  
282 different gait phases: there was a cluster with a significant number of patients with crouch and a weaker

283 RF, in addition to a cluster with patients with (correlated) normal EMG patterns. In this research, we  
284 used blind, unsupervised clustering without any prior information about the available EMG data. The  
285 only inclusion criteria applied were the availability of data from patients who walked barefoot and  
286 without any assistance. Applying such an algorithm on a large database (collected in our center) with  
287 more than 1000 examinations aided us in identifying general trends in the EMG data of CP patients.  
288 Furthermore, the term E2 in our study addressed the second examination of patients in whom a gait  
289 test (E1) had previously been performed in the lab. As a result, this does not apply to a before-after  
290 surgery scenario. However, it is important to note that these patients are typically engaged in an  
291 everyday training program. In the present study, the inclusion or exclusion criteria did not specifically  
292 consider the aspect of "treatment" initially. Moreover, the crosstalk from the surrounding vastus  
293 lateralis muscle on the activity of RF has recently been extensively reported as a common issue when  
294 employing surface EMG, especially in the presence of crouch gait observed in children with CP [37].  
295 However, utilizing wire fine EMG, true activation of RF was noted in 30-45% of crouched gait cycles  
296 [37]. Our study specifically focuses on the 20-45% phase of gait in G1 and G2, addressing this actual  
297 part of RF activity. Nevertheless, despite lacking access to an extensive database of wire fine EMG  
298 data from CP patients, we believe that surface EMG, as a non-invasive and clinically relevant measure  
299 of gait in individuals with CP, has the capacity to capture the primary characteristics of muscle activity  
300 in these patients.

301 To overcome the K-mean algorithm initialization problem, we developed a hybrid K-mean and PSO  
302 optimization approach. As no similar study on the clustering of EMG data in CP has been conducted,  
303 our research focused only on one muscle (RF) and, further, the crouch condition to investigate the  
304 possibility of developing CP-EMG assessment approaches. These findings seem promising and suggest  
305 that clustering analyses should be applied on datasets with more muscles. In addition, we mainly

306 evaluated knee movement while other joints and gait abnormalities could also be included in future  
307 studies.

## 308 **5 Conflict of Interest**

309 ‘The authors declare that the research was conducted in the absence of any commercial or financial  
310 relationships that could be construed as a potential conflict of interest.’

311 There is no conflict of interest.

## 312 **6 Author Contributions**

313 MD: Writing original draft, Data analysis; FS: Review & editing, Methodology; RR: Data analysis;  
314 DAP: Review & editing; SIW: Review & editing, Conceptualization, Methodology, Project  
315 administration.

## 316 **7 Funding**

317 This research was funded by German Research Foundation (DFG) (no: WO 1624/ 8-1).

## 318 **8 Supplementary material**

319 “S1 Appendix”.

## 320 **References**

- 321 1. Carr LJ, Reddy SK, Stevens S, Blair E, Love S. Definition and classification of cerebral  
322 palsy. *Developmental medicine and child neurology*. 2005;47(8):508-10.
- 323 2. Patel DR, Neelakantan M, Pandher K, Merrick J. Cerebral palsy in children: a clinical  
324 overview. *Translational pediatrics*. 2020;9(Suppl 1):S125-s35.
- 325 3. Dreher T, Wolf SI, Maier M, Haggmann S, Vegvari D, Gantz S, et al. Long-term results after  
326 distal rectus femoris transfer as a part of multilevel surgery for the correction of stiff-knee gait in  
327 spastic diplegic cerebral palsy. *The Journal of bone and joint surgery American volume*.  
328 2012;94(19):e142(1-10).
- 329 4. Reinbolt JA, Fox MD, Schwartz MH, Delp SL. Predicting outcomes of rectus femoris transfer  
330 surgery. *Gait & posture*. 2009;30(1):100-5.
- 331 5. Patikas D, Wolf S, Döderlein L. Electromyographic evaluation of the sound and involved side  
332 during gait of spastic hemiplegic children with cerebral palsy. *European journal of neurology*.  
333 2005;12(9):691-9.



- 334 6. Patikas D, Wolf SI, Schuster W, Armbrust P, Dreher T, Döderlein L. Electromyographic  
335 patterns in children with cerebral palsy: do they change after surgery? *Gait & posture*.  
336 2007;26(3):362-71.
- 337 7. Kay RM, Pierz K, McCarthy J, Graham HK, Chambers H, Davids JR, et al. Distal rectus  
338 femoris surgery in children with cerebral palsy: results of a Delphi consensus project. *Journal of*  
339 *children's orthopaedics*. 2021;15(3):270-8.
- 340 8. Gage JR, Perry J, Hicks RR, Koop S, Werntz JR. Rectus femoris transfer to improve knee  
341 function of children with cerebral palsy. *Developmental medicine and child neurology*.  
342 1987;29(2):159-66.
- 343 9. Josse A, Pons C, Printemps C, Chan-Wai-Nam J, Affes H, Brochard S, et al. Rectus femoris  
344 surgery for the correction of stiff knee gait in cerebral palsy: A systematic review and meta-analysis.  
345 *Orthopaedics & traumatology, surgery & research : OTSR*. 2023;109(3):103022.
- 346 10. Türker KS. Electromyography: some methodological problems and issues. *Physical therapy*.  
347 1993;73(10):698-710.
- 348 11. Schmidt-Rohlfing B, Bergamo F, Williams S, Erli HJ, Rau G, Niethard FU, et al.  
349 Interpretation of surface EMGs in children with cerebral palsy: An initial study using a fuzzy expert  
350 system. *Journal of orthopaedic research : official publication of the Orthopaedic Research Society*.  
351 2006;24(3):438-47.
- 352 12. Sutherland DH, Davids JR. Common gait abnormalities of the knee in cerebral palsy. *Clinical*  
353 *orthopaedics and related research*. 1993(288):139-47.
- 354 13. Rodda JM, Graham HK, Carson L, Galea MP, Wolfe R. Sagittal gait patterns in spastic  
355 diplegia. *The Journal of bone and joint surgery British volume*. 2004;86(2):251-8.
- 356 14. Papageorgiou E, Nieuwenhuys A, Vandekerckhove I, Van Campenhout A, Ortibus E,  
357 Desloovere KJG, et al. Systematic review on gait classifications in children with cerebral palsy: an  
358 update. 2019;69:209-23.
- 359 15. Oyewole GJ, Thopil GA. Data clustering: application and trends. *Artificial intelligence*  
360 *review*. 2023;56(7):6439-75.
- 361 16. Kuntze G, Nettel-Aguirre A, Ursulak G, Robu I, Bowal N, Goldstein S, et al. Multi-joint gait  
362 clustering for children and youth with diplegic cerebral palsy. *PloS one*. 2018;13(10):e0205174.
- 363 17. Choisne J, Fourrier N, Handsfield G, Signal N, Taylor D, Wilson N, et al. An Unsupervised  
364 Data-Driven Model to Classify Gait Patterns in Children with Cerebral Palsy. *Journal of clinical*  
365 *medicine*. 2020;9(5).
- 366 18. Sangeux M, Rodda J, Graham HK. Sagittal gait patterns in cerebral palsy: the plantarflexor-  
367 knee extension couple index. *Gait & posture*. 2015;41(2):586-91.
- 368 19. Prakash C, Kumar R, Mittal N. Optimized Clustering Techniques for Gait Profiling in  
369 Children with Cerebral Palsy for Rehabilitation. *The Computer Journal*. 2018;61(11):1683-94.
- 370 20. Rana S, Jasola S, Kumar RJIJoE, Science, Technology. A hybrid sequential approach for data  
371 clustering using K-Means and particle swarm optimization algorithm. 2010;2(6).
- 372 21. Van Der Merwe D W. Data clustering using particle swarm optimization. *The 2003 Congress*  
373 *on Evolutionary Computation (CEC03)*. 2003;1:215-20.
- 374 22. Guo L-Y, Su F-C, Lin C-J, Cherng R-J, Chou Y-LJG, Posture. Common abnormal kinetic  
375 patterns of the knee in gait in cerebral palsy. 1997;2(5):151-2.
- 376 23. Kadaba MP, Ramakrishnan H, Wootten MJJoor. Measurement of lower extremity kinematics  
377 during level walking. 1990;8(3):383-92.
- 378 24. Hermens HJ, Freriks B, Merletti R, Stegeman D, Blok J, Rau G, et al. European  
379 recommendations for surface electromyography. 1999;8(2):13-54.
- 380 25. John J, John JIJorr. Grading of muscle power: comparison of MRC and analogue scales by  
381 physiotherapists. 1984;7(2):173-82.

- 382 26. Marks M, Alexander J, Sutherland D, Chambers HJ, neurology c. Clinical utility of the  
383 Duncan-Ely test for rectus femoris dysfunction during the swing phase of gait. 2003;45(11):763-8.
- 384 27. Gracies J-M, Burke K, Clegg NJ, Browne R, Rushing C, Fehlings D, et al. Reliability of the  
385 Tardieu Scale for assessing spasticity in children with cerebral palsy. 2010;91(3):421-8.
- 386 28. Wolf SI, Mikut R, Kranzl A, Dreher TJG, Posture. Which functional impairments are the  
387 main contributors to pelvic anterior tilt during gait in individuals with cerebral palsy?  
388 2014;39(1):359-64.
- 389 29. Amene J, Krzak JJ, Kruger KM, Killen L, Graf A, Altiok H, et al. Kinematic foot types in  
390 youth with pes planovalgus secondary to cerebral palsy. 2019;68:430-6.
- 391 30. Joshi KD, Nalwade PS, JoCS, Computing M. Modified k-means for better initial cluster  
392 centres. 2013;2(7):219-23.
- 393 31. Baker R, McGinley JL, Schwartz MH, Beynon S, Rozumalski A, Graham HK, et al. The gait  
394 profile score and movement analysis profile. 2009;30(3):265-9.
- 395 32. Pataky TC. Generalized n-dimensional biomechanical field analysis using statistical  
396 parametric mapping. 2010;43(10):1976-82.
- 397 33. DeLuca P, Bell K, Davis RJG, Posture. Using surface electrodes for the evaluation of the  
398 rectus femoris, vastus medialis and vastus lateralis muscles in children with cerebral palsy.  
399 1997;5(3):211-6.
- 400 34. Ganjwala D, Shah H. Management of the knee problems in spastic cerebral palsy.  
401 2019;53:53-62.
- 402 35. Lloyd DG, Besier TF. An EMG-driven musculoskeletal model to estimate muscle forces  
403 and knee joint moments in vivo. 2003;36(6):765-76.
- 404 36. Kodinariya TM, Makwana PR. Review on determining number of Cluster in K-Means  
405 Clustering. 2013;1(6):90-5.
- 406 37. Barr KM, Miller AL, Chapin KBJG, posture. Surface electromyography does not accurately  
407 reflect rectus femoris activity during gait: impact of speed and crouch on vasti-to-rectus crosstalk.  
408 2010;32(3):363-8.

409
